# Supplementary material for: Gypenoside LXXV Promotes Cutaneous Wound Healing In Vivo by Enhancing Connective Tissue Growth Factor Levels Via the Glucocorticoid Receptor Pathway
Source: PubMed Central journal article supplement (PMC6515290; doi:10.3390/molecules24081595), 2019-04-23
Supplement: molecules-24-01595-s001.pdf [file molecules-24-01595-s001.pdf]

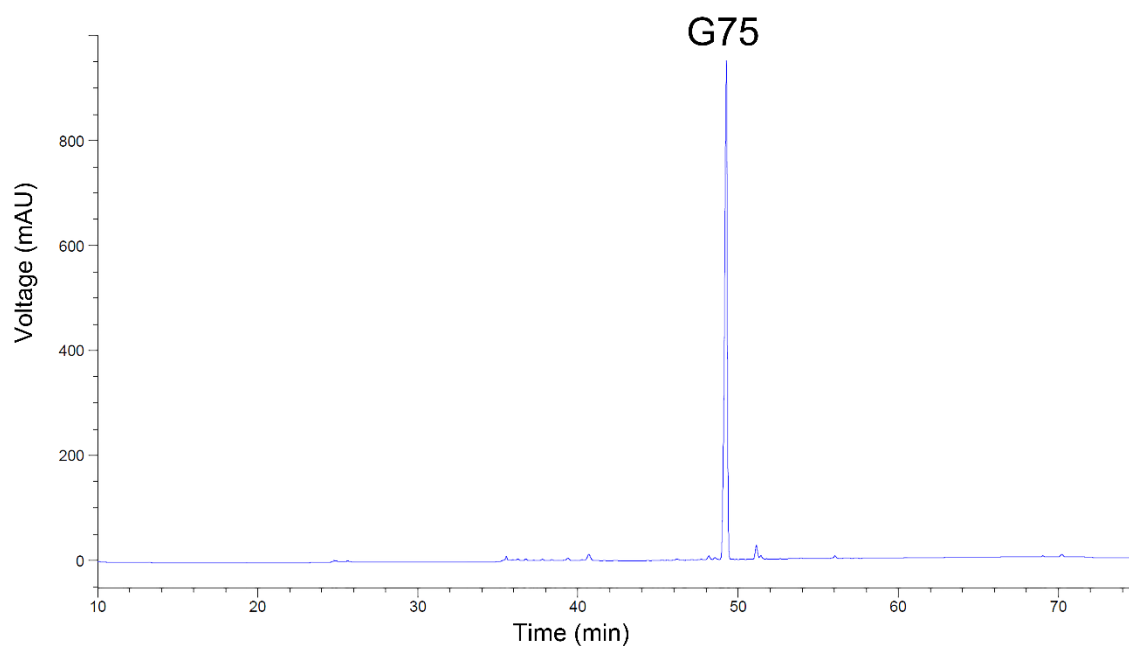

**Supplementary Figure S1.** HPLC results of the purified G75 (95.1%). The HPLC analysis was performed using an HPLC system (Younglin Co. Ltd, Korea). The separation was performed on a Prodigy ODS (2) C<sub>18</sub> column (5  $\mu$ m, 150  $\times$  4.6 mm i.d., Phenomenex, CA, USA) with a guard column (Eclipse XDB C<sub>18</sub>, 5  $\mu$ m, 12.5  $\times$  4.6 mm i.d., Agilent Technologies, CA, USA). The flow rate was 1.0 ml/min, and the detection was measured by monitoring the absorbance at 203 nm and with an injected volume of 25  $\mu$ l.
